# Supplementary material for: A hydrogel based on Fe(ii)-GMP demonstrates tunable emission, self-healing mechanical strength and Fenton chemistry-mediated notable antibacterial properties
Source: Royal Society of Chemistry journal article supplement (doi:10.1039/d4nr01011f), 2024-01-01
Supplement: d4nr01011f1.pdf [file d4nr01011f1.pdf]

## Supporting Information

# Hydrogel based on Fe(II)-GMP demonstrates Tunable Emission, Self-healing Mechanical Strength and Fenton Chemistry mediated Notable Antibacterial Properties

Umesh,<sup>a†</sup> Vysakh C. Chandran,<sup>a†</sup> Pranoy Saha,<sup>b</sup> Debasish Nath,<sup>a</sup> Sayan Bera,<sup>b</sup> Santanu Bhattacharya<sup>\*,b,c</sup> and Asish Pal<sup>\*a</sup>

<sup>a</sup> Chemical Biology Unit, Institute of Nano Science and Technology, Knowledge City, Sector 81, Mohali, Punjab 140306 (India) E-mail: [apal@inst.ac.in](mailto:apal@inst.ac.in)

<sup>b</sup> School of Applied & Interdisciplinary Sciences, Indian Association for the Cultivation of Science, Kolkata, 700032 (India) E-mail: [sb23in@yahoo.com](mailto:sb23in@yahoo.com)

<sup>c</sup> Department of Chemistry, Indian Institute of Science Education and Research Tirupati, Yerpedu Mandal, Tirupati District, Andhra Pradesh, 517619 (India)

<sup>†</sup>Umesh and Vysakh contributed equally.

## TABLE OF CONTENTS

|                                                                                                            |           |
|------------------------------------------------------------------------------------------------------------|-----------|
| <b>Materials and Methods</b>                                                                               | <b>S2</b> |
| <b>Synthesis of Tetra(4-carboxylphenyl) ethylene (1)</b>                                                   | <b>S2</b> |
| <b>NMR characterization of 1<sub>GMP</sub> &amp; Angular sweep oscillatory rheology of 1<sub>GMP</sub></b> | <b>S3</b> |
| <b>Characterization and properties of metallogels</b>                                                      | <b>S4</b> |
| <b>Control gelation experiments</b>                                                                        | <b>S5</b> |
| <b>Fenton reaction and mechanical properties</b>                                                           | <b>S5</b> |
| <b>Rheological studies of Fe-1<sub>GMP</sub> V/S Fe-1<sub>GMP</sub>+AA</b>                                 | <b>S6</b> |
| <b>Antimicrobial and Biocompatibility studies</b>                                                          | <b>S7</b> |
| <b>Reference</b>                                                                                           | <b>S7</b> |

## Materials and methods

### Materials

All reagents, both chemical and biological, employed in this study were sourced from reputable manufacturers and maintained the highest quality standards. Sigma supplied 5'-GMP and  $\text{FeCl}_2 \cdot 4\text{H}_2\text{O}$ , while spectrochem chemicals provided  $\text{MgCl}_2$  and  $\text{CaCl}_2$ . Biological materials, including bacterial growth media such as Luria Bertani broth and Nutrient agar, were obtained from HIMEDIA. Nuclear Magnetic Resonance spectra ( $^1\text{H-NMR}$ ) were recorded using a FT-NMR Bruker 400 MHz NMR spectrometer. UV-visible spectra were recorded using an Agilent Cary 60 spectrophotometer. Circular Dichroism (CD) spectra were obtained using a JASCO J-1500 Circular Dichroism Spectrometer in Easton, MD, USA. Fluorescence spectra were recorded with an Edinburgh Instruments Spectrofluorometer FS5. X-ray diffraction (XRD) studies were conducted using a Bruker D8 Advance Powder X-ray Diffractometer. Scanning Electron Microscopy (FESEM) images were acquired using a JEOL JEM 2100 scanning electron microscope from Tokyo, Japan.

### Synthesis of Tetra(4-carboxylphenyl) ethylene (1)

The molecule TPE, **1** was synthesized by following the previously reported procedure<sup>S1</sup> and characterized by  $^1\text{H-NMR}$  spectroscopy.

#### Scheme 1

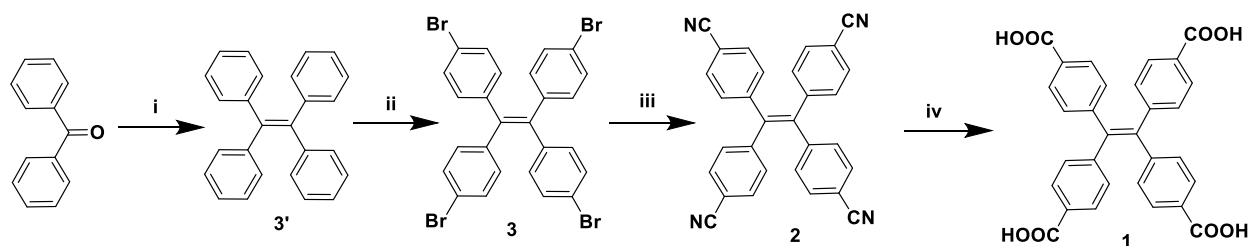

**Reagents & Conditions:** (i)  $\text{TiCl}_4$ , Zn Powder, Dry THF, 0 -70°C, overnight; (ii)  $\text{Br}_2$ , Glacial Acetic acid, DCM, 0 °C, 3h; (iii)  $\text{CuCN}$ , DMF, reflux, 2 days; (iv)  $\text{KOH}$ , ethylene glycol, 200 °C, 3 days.

$^1\text{H-NMR}$  ( $\text{DMSO-}d_6$ ) of **3**,  $\delta$  (ppm): 12.93 (br s, 4H), 7.73 (d, 2H), 7.13 (d, 2H).

### NMR characterization of $1_{\text{GMP}}$ hydrogel

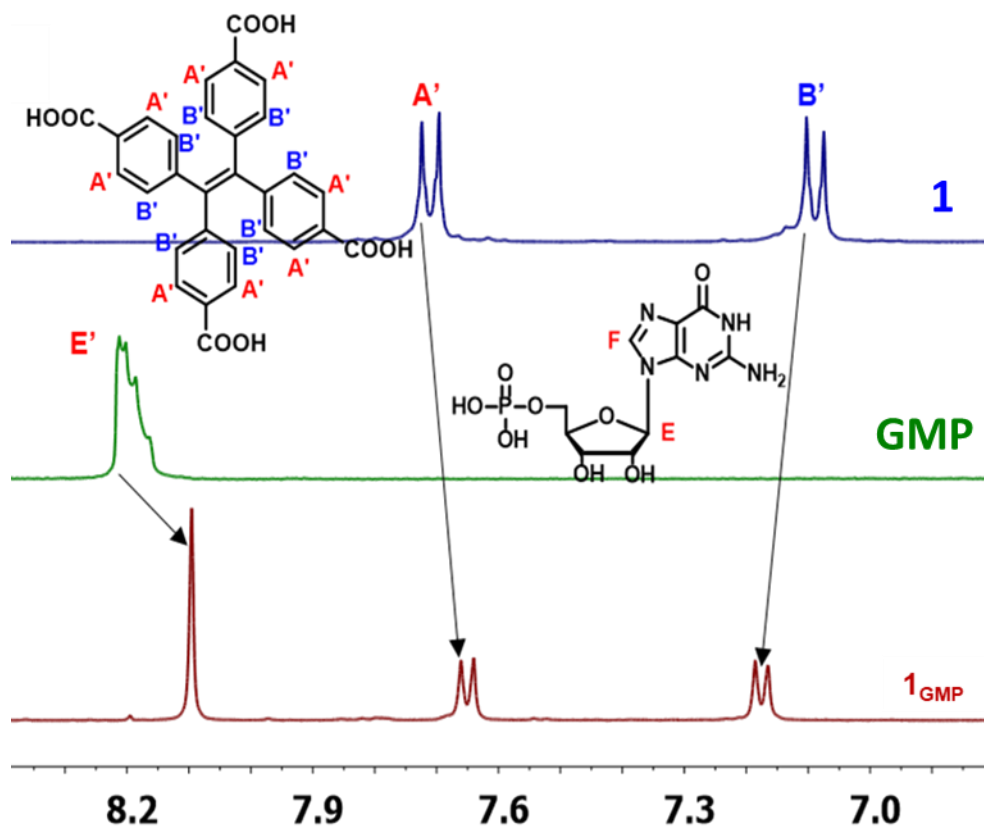

**Fig. S1**  $^1\text{H-NMR}$  spectra for the **1** in  $\text{DMSO-d}_6$ ,  $5'$ -GMP in  $\text{D}_2\text{O}$  and  $1_{\text{GMP}}$  in  $\text{D}_2\text{O}$ , showing the shifts in peak position of the aromatic protons.

## Characterization and properties of metallogels, M-1<sub>GMP</sub>

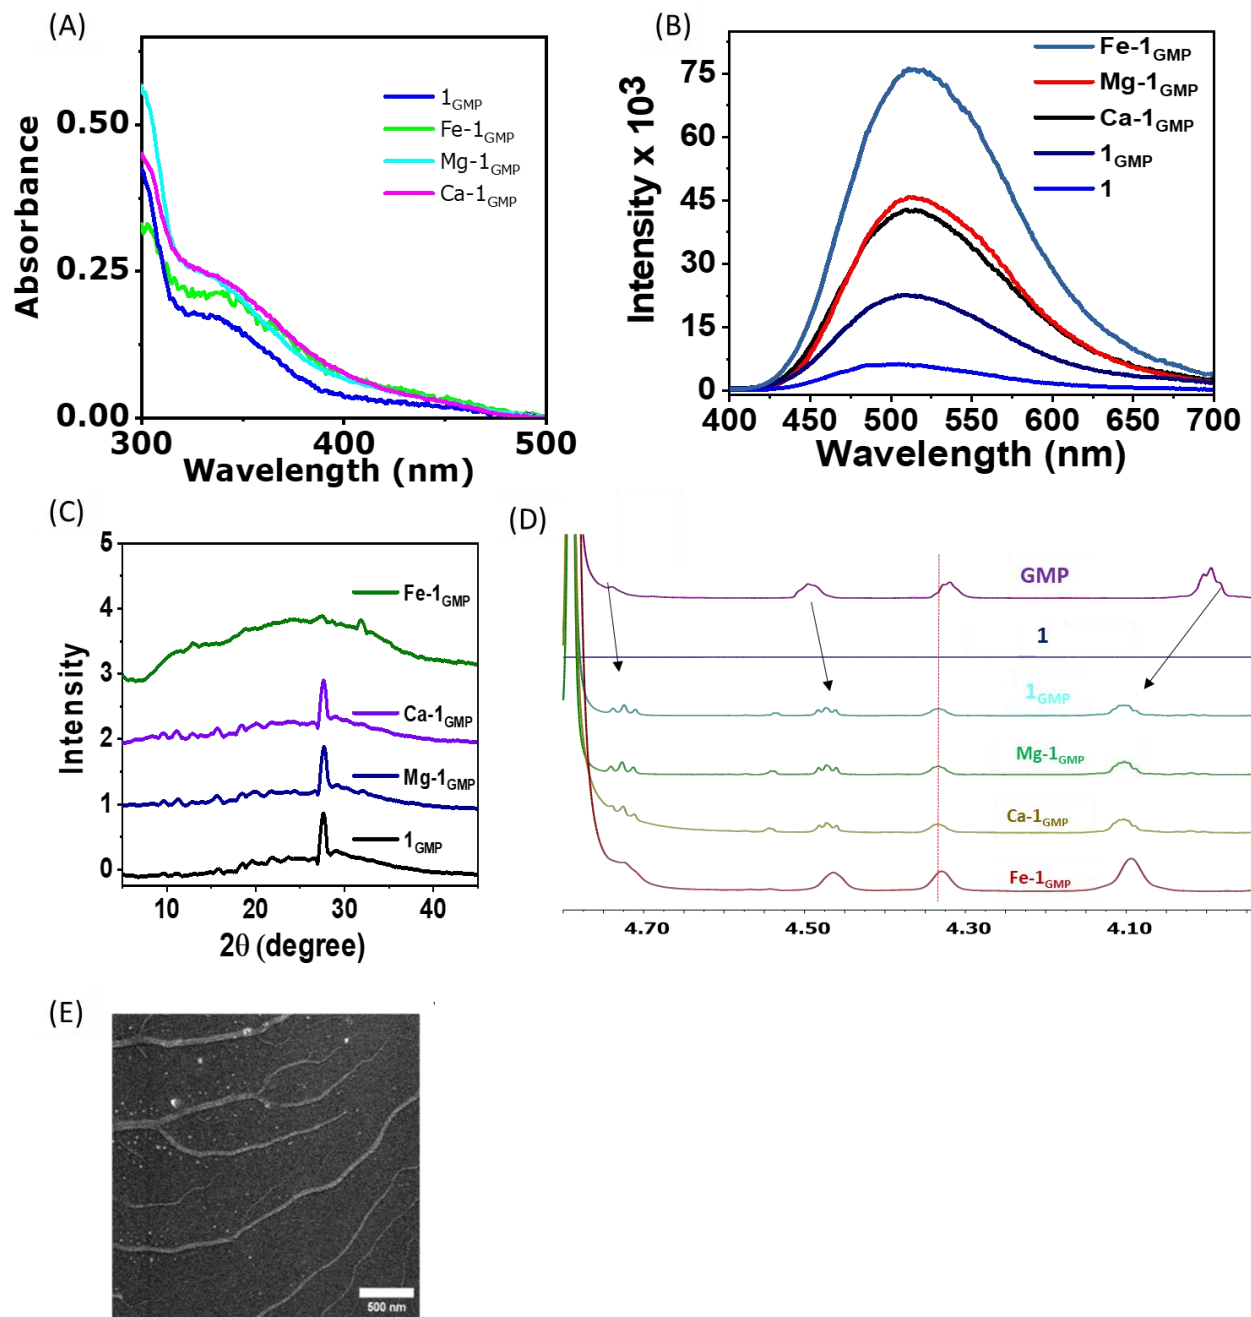

**Fig. S2** (A) Comparative UV-vis spectra of the metallogels, **M-1<sub>GMP</sub>** with **1<sub>GMP</sub>**. (B) Fluorescence spectra showing enhanced emission of metallogels, **M-1<sub>GMP</sub>**. (C) PXRD data showing absence of peak at  $2\theta = 27.5^\circ$  corresponding to G4-quadruplex. (D)  $^1\text{H}$  NMR spectra of the metallogels, **M-1<sub>GMP</sub>** showing shift of the pentose sugar protons. (E) FE-SEM image of **Fe-1<sub>GMP</sub>** showing fibrous morphology.

### Gelation studies

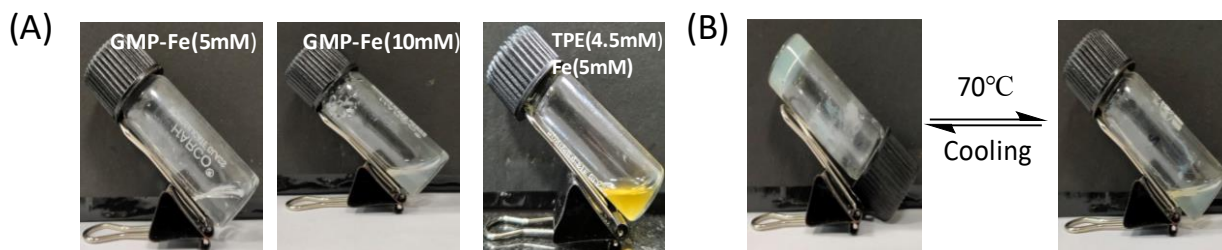

**Fig. S3** (A) Control gelation experiment of G-quartet of GMP with TPE (1) and Fe. (B) Reversible hydrogel formation of **Fe-1<sub>GMP</sub>** by subsequent heat-cool cycles.

### Fenton reaction in metallo gels, M-1<sub>GMP</sub>

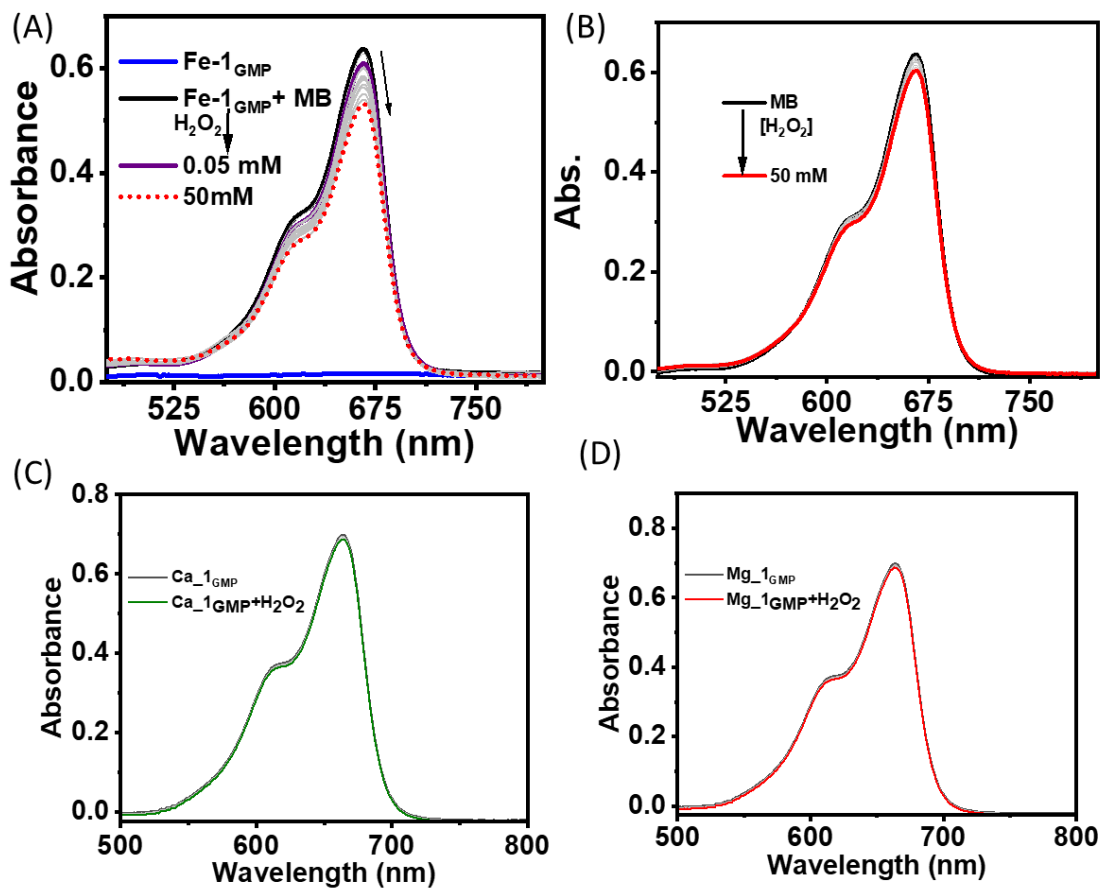

**Fig. S4** (A) Concentration dependent degradation of MB dye with addition of H<sub>2</sub>O<sub>2</sub> in presence of **Fe-1<sub>GMP</sub>**. (B) Degradation MB in presence of H<sub>2</sub>O<sub>2</sub> only. (C-D) Control experiments showing no ROS formation in the hydrogels of **Ca-1<sub>GMP</sub>** & **Mg-1<sub>GMP</sub>**.

## Rheological studies of Fe-1<sub>GMP</sub> V/S Fe-1<sub>GMP</sub>+AA

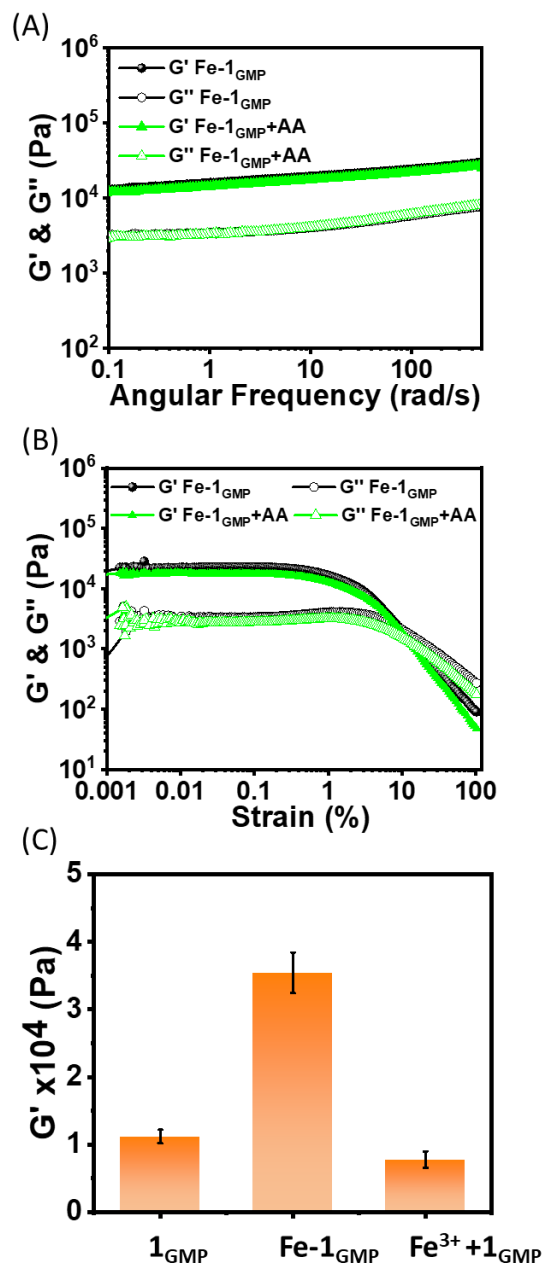

**Fig. S5** (A-B) Frequency sweep and amplitude sweep rheological study of Fe-1<sub>GMP</sub> after loading AA. (C) Comparison of the storage moduli of 1<sub>GMP</sub>, Fe-1<sub>GMP</sub>+AA and Fe<sup>3+</sup> loaded 1<sub>GMP</sub>.

## Antimicrobial and Biocompatibility studies

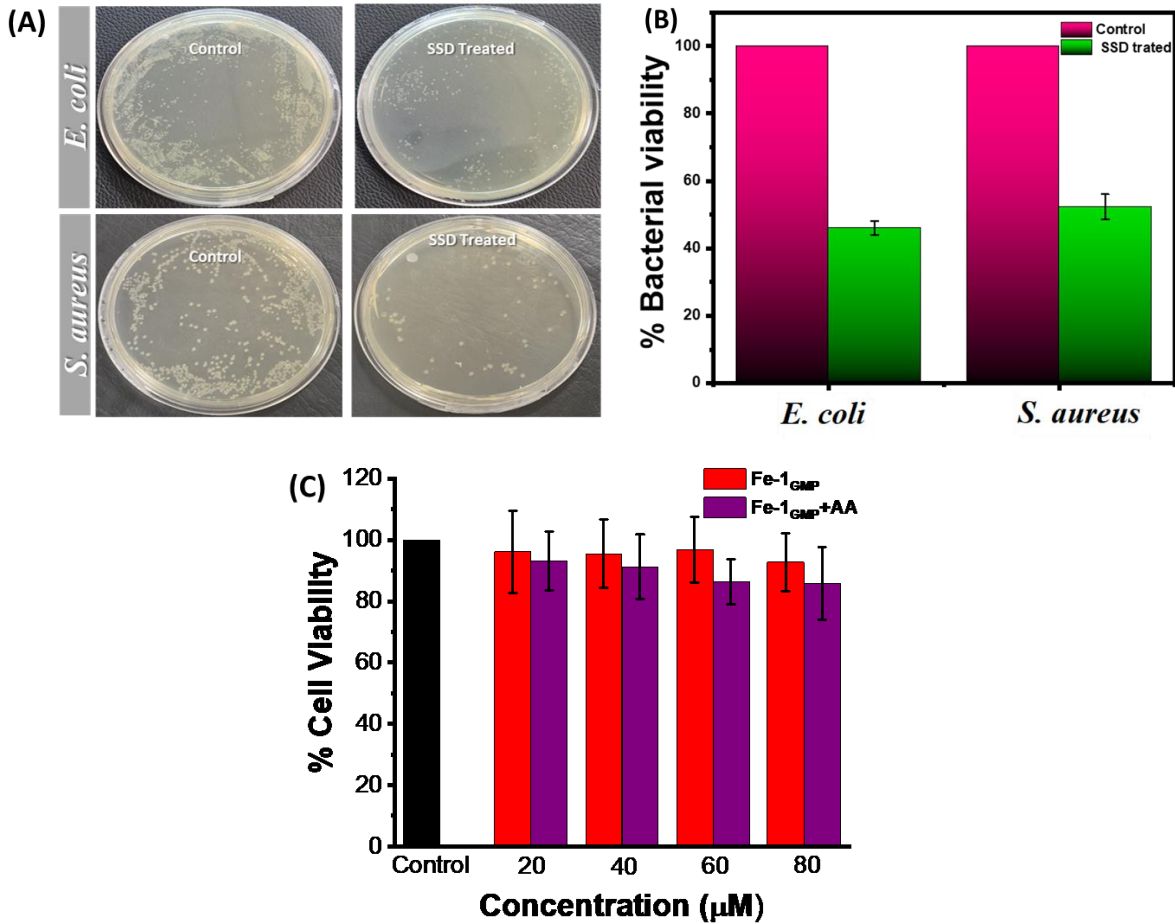

**Fig. S6** (A) Images of bacterial colonies formed treating silver sulfadiazine (SSD) at its MIC, *E. coli* 23.7 μg/mL (upper panel) *S. aureus* 47.5 μg/mL (lower panel) and (B) corresponding histogram of comparison of survival percentage of bacterial cells. Control is without SSD administration. (C) MTT assay for Fe-1<sub>GMP</sub> and Fe-1<sub>GMP</sub>+AA loaded hydrogels in L929 cell line.

### Reference:

S1. A. Bhunia, V. Vasylyeva, C. Janiak, *Chem. Commun.*, 2013, **49**, 3961-3963.
